# Supplementary material for: Substoichiometric two-dimensional molybdenum oxide flakes: a plasmonic gas sensing platform
Source: Royal Society of Chemistry journal article supplement (doi:10.1039/c4nr03073g), 2014-01-01
Supplement: c4nr03073g1.pdf [file c4nr03073g1.pdf]

## Supplementary Information

# Substoichiometric Two-Dimensional Molybdenum Oxide Flakes: A Plasmonic Gas Sensing Platform

Manal M. Y. A. Alsaif,<sup>\*a</sup> Matthew R. Field,<sup>b</sup> Billy J. Murdoch,<sup>b</sup> Torben Daeneke,<sup>a</sup> Kay  
Latham,<sup>c</sup> Adam F. Chrimes,<sup>a</sup> Ahmad Sabirin Zoolfakar,<sup>a</sup> Salvy P. Russo,<sup>c</sup> Jian Zhen Ou<sup>\*a</sup> and  
Kourosh Kalantar-zadeh<sup>\*a</sup>

<sup>a</sup> School of Electrical and Computer Engineering RMIT University, Melbourne, Victoria,  
Australia

<sup>b</sup> RMIT Microscopy and Microanalysis Facility, RMIT University, Melbourne, Victoria,  
Australia

<sup>c</sup> School of Applied Sciences, RMIT University, Melbourne, Victoria, Australia

<sup>\*</sup>E-mail: S3372431@student.rmit.edu.au, jianzhen.ou@rmit.edu.au and

Kourosh.kalantar@rmit.edu.au

## S1: Optical gas measurement setup

The chamber consists of two ports for gas inlet and outlet, and two electrical connectors for an electrical heating plate (Fig. S1). Inside the chamber, a holder frame with open window was utilized to mount the molybdenum oxide samples during testing. The chamber was fixed on to a stage with two optical fibre cables and adapters for the connection with the light source and the spectrophotometer, respectively.

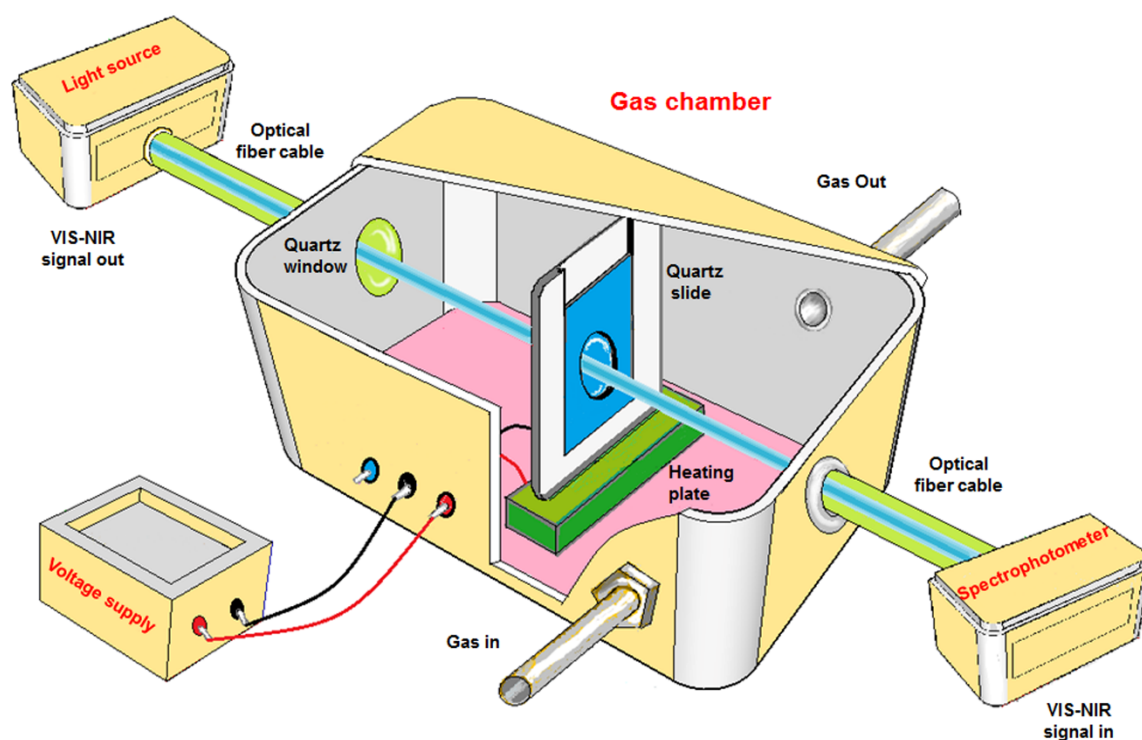

**Fig. S1** Illustration of the optical gas testing chamber.

## S2: The extended Raman spectra and AFM adhesion mappings of the 2D molybdenum oxide samples

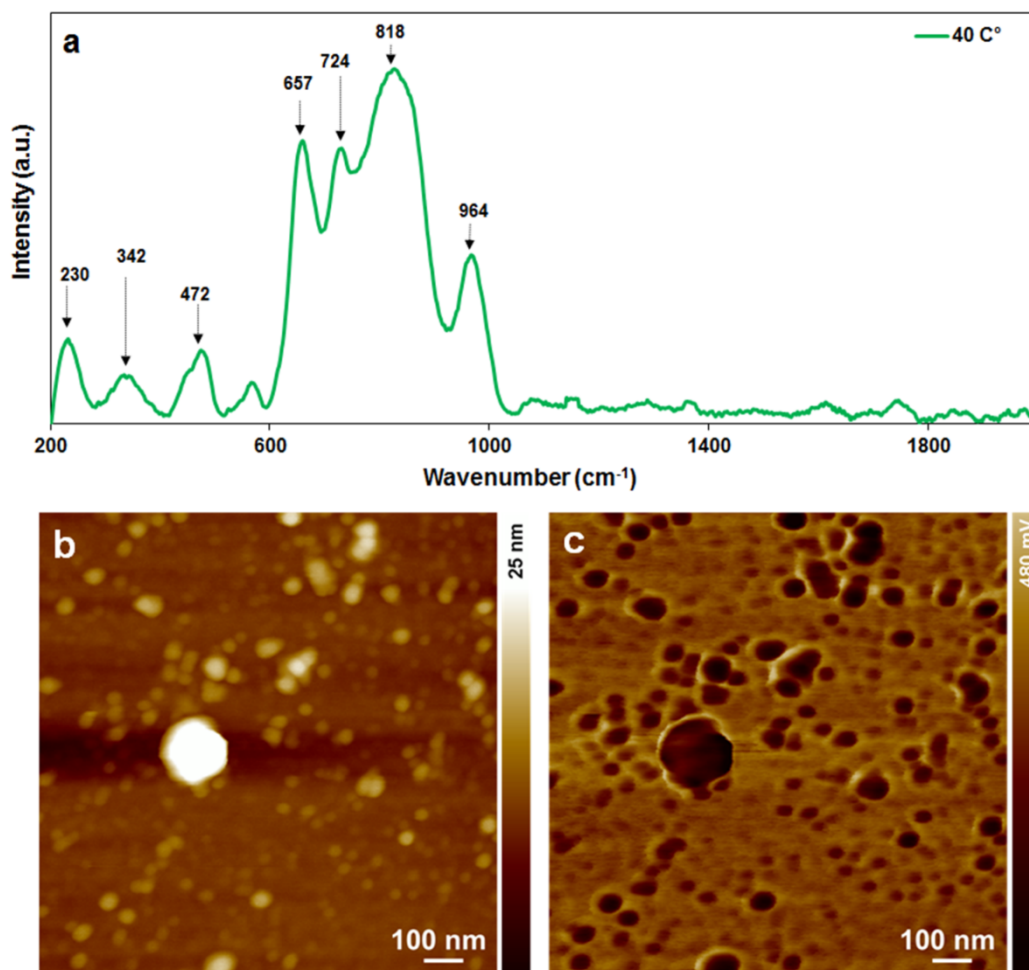

**Fig. S2.** (a) The Raman spectrum of the drop casted film made of 2D Mo<sub>4</sub>O<sub>11</sub> flakes that were dried at 40 °C. (b) The AFM image of a very low concentration suspension of 2D flakes drop casted onto Si substrate and (c) The corresponding AFM adhesion image of the same area. The adhesion image shows that the surface energy of the flakes are similar (they have similar surface voltages) and hence should demonstrate similar van der Waals forces, assisting them to lie horizontally and homogenous on top of each other. At high concentration of flakes in the suspensions, drop casting results in the formation of stable films with many flakes hold together by these van der Waals forces.

### **S3: The surface morphology of the 2D molybdenum oxide film**

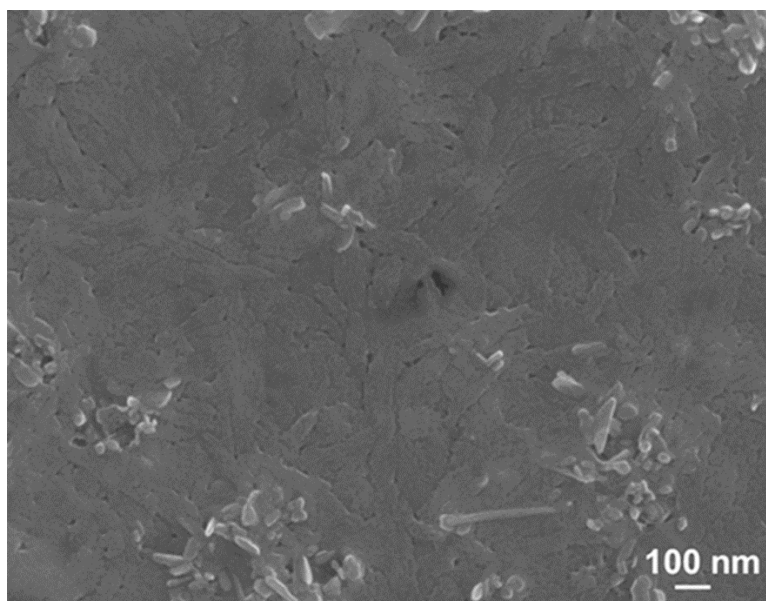

**Fig. S3.** The SEM image of the film made of high concentration 2D molybdenum oxide flakes after annealing at 40 °C shows the surface morphology and the flakes distribution. It can be observed that these flakes are compactly and horizontally placed onto each other, forming a relatively homogeneous film.

**S4: Crystal structure of the 2D molybdenum oxide film after light exposure from the UV-Vis-NIR light source**

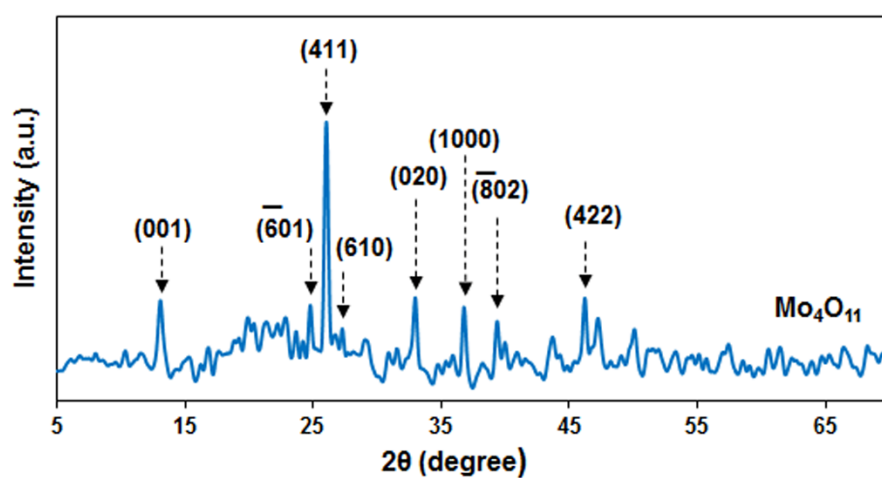

**Fig. S4.** The XRD pattern of the 2D molybdenum oxide film after light exposure from the UV-Vis-NIR light source.

## S5: The DFT calculations

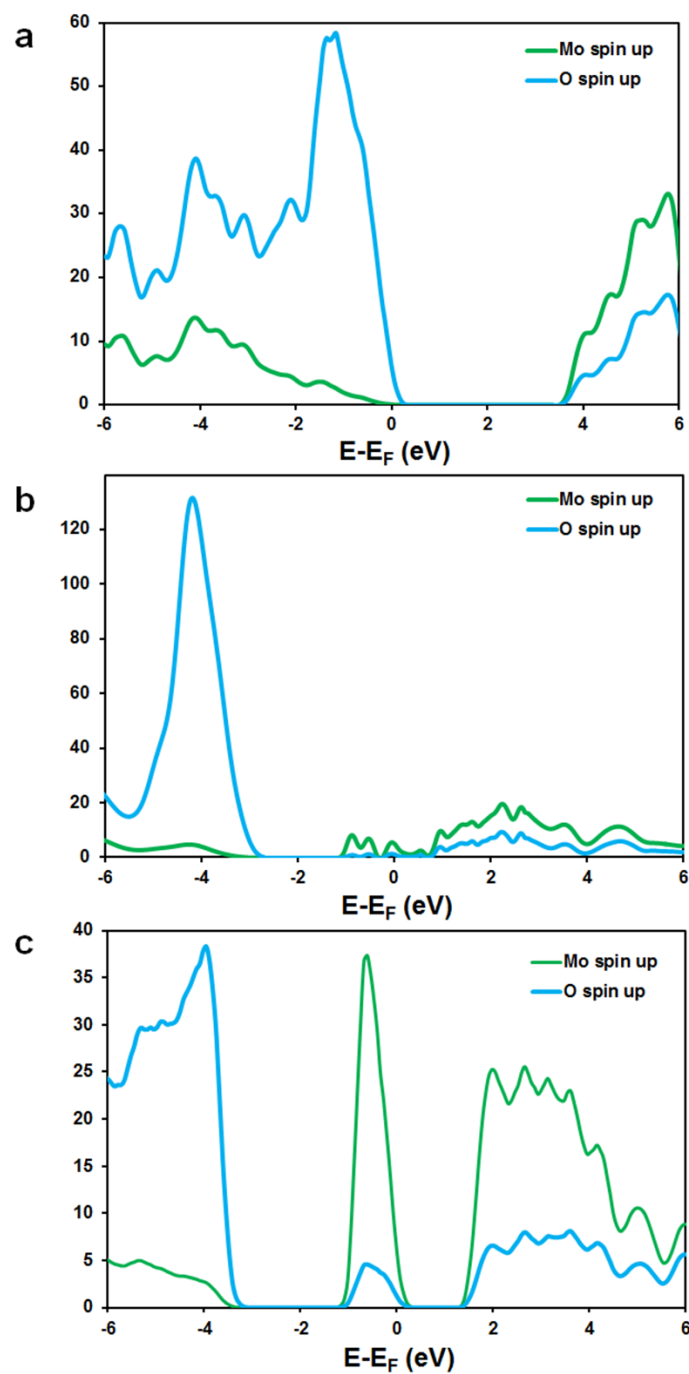

**Fig. S5** The density of states calculated by DFT of: (a)  $\alpha$ -MoO<sub>3</sub>, (b) Monoclinic Mo<sub>4</sub>O<sub>11</sub> and (c) Monoclinic MoO<sub>2</sub>.

## S6: The Summery of plasmonic H<sub>2</sub> gas sensors reported previously

**Table S1** The summary of plasmonic sensors in terms of response factor, response and recovery time for H<sub>2</sub> gas sensing.

| Sensitive layer    | Operating temperature (°C) | Response factor (%) | Response time (s) | Recovery time (s) | Sensing response range | Ref |
|--------------------|----------------------------|---------------------|-------------------|-------------------|------------------------|-----|
| Al-ZnO             | 500                        | 33                  | N/A               | N/A               | 1500–2500 nm           | 1   |
| Pt/WO <sub>3</sub> | 150                        | 0.16                | 40–55             | 40–55             | 200–900 nm             | 2   |
| Au-YSZ             | 500                        | 150                 | N/A               | N/A               | 450–850 nm             | 3   |
| AuH-rGO            | 150                        | 0.4                 | 60                | 120               | 200–900 nm             | 4   |

## References

- 1 P. R. Ohodnicki Jr., C. Wang and M. Andio, *Thin Solid Films*, 2013, **539**, 327-336.
- 2 M. U. Qadri, A. F. D. Diaz, M. Cittadini, A. Martucci, M. C. Pujol, J. Ferre-Borrull, E. Llobet, M. Aguilo and F. Diaz, *Sensors* 2014, **14**, 11427-11443.
- 3 G. Dharmalingam, N. A. Joy, B. Grisafe and M. A. Carpenter, *Beilstein J. Nanotechnol.*, 2012, **3**, 712-721.
- 4 M. Cittadini, M. Bersani, F. Perrozzi, L. Ottaviano, W. Wlodarski and A. Martucci, *Carbon*, 2014, **69**, 452-459.
